# Supplementary material
Source: publisher figshare collection journal article supplement (https://acs.figshare.com/ndownloader/files/4764646)
Supplement: Supplementary file 1 [file 4764646]

## Supporting Information for:

# Stability and Porosity Enhancement Through Concurrent Ligand Extension and SBU Modification

Daofeng Sun, Yanxiong Ke, Tracy M. Mattox, Sean Parkin, and Hong-Cai Zhou\*

*Department of Chemistry and Biochemistry, Miami University, Oxford, OH 45056, USA*

## Experimental Section

**Materials and Methods.** All starting materials were obtained commercially and used without further purification. Thermal gravimetric analyses (TGA) were performed under N<sub>2</sub> on a PerkinElmer TGA 7 analyzer. A Beckman Coulter SA 3100 surface area analyzer was used to measure gas adsorption. Solution NMR spectra were collected on a Bruker 200 MHz spectrometer. Elemental analyses (C, H, and N) were performed by Canadian Microanalytical Services, Ltd.

Synthesis of tri-(p-bromophenyl)-benzene and 4-methoxycarbonylphenylboronic acid were carried out according to literature procedures.<sup>1-3</sup>

**Synthesis of 1,3,5-tris(4'-methoxycarbonyl[1,1'-biphenyl]-4-yl)-benzene.** To a 500 mL Schlenk flask was added 6 g 4-methoxycarbonylphenylboronic acid, 6.03 g tri-(p-bromophenyl)-benzene, 9 g CsF, and 0.5 g Pd(PPh<sub>3</sub>)<sub>4</sub> followed by 300 mL of degassed 1,2-dimethoxyethane. The solution was allowed to reflux under nitrogen for 48 hours and dried on a rotary evaporator. Approximately 100 mL H<sub>2</sub>O was added and the compound extracted with CHCl<sub>3</sub>. The organic phase was eluted with chloroform through a short silica column and dried to yield a light yellow powder. <sup>1</sup>H

NMR (CDCl<sub>3</sub>): 3.94, 3H; 7.70-7.84, 6H, 7.88, 1H, 8.13, 2H.

**Synthesis of 1,3,5-tris(4'-carboxy[1,1'-biphenyl]-4-yl)-benzene.** 2 mL concentrated NaOH solution was added to a suspension of 3 g 1,3,5-tris(p-(4-methoxycarbonyl)biphenyl)benzene in 100 mL THF/MeOH (v:v = 1:1) and the mixture allowed to stir overnight. The pH value was adjusted to about two using concentrated HCl. The white solid was collected by filtration, washed with water and dried under vacuum.

**Synthesis of Zn<sub>4</sub>(OH)<sub>2</sub>(H<sub>2</sub>O)<sub>2</sub>(py)<sub>2</sub>(TCBPB)<sub>2</sub>·3DMF·py·3H<sub>2</sub>O (1).** A mixture of Zn(NO<sub>3</sub>)<sub>2</sub>·6H<sub>2</sub>O (0.015 g, 5.0 × 10<sup>-5</sup> mol), H<sub>3</sub>TCBPB (0.0025 g, 3.77 × 10<sup>-6</sup> mol) and pyridine (0.025 mL) in DMF, ethanol and water (1.5 mL, v/v = 5:2:1) was sealed under vacuum in a Pyrex tube. The tube was heated to 85°C, held for 24 hours, and cooled to room temperature at a rate of 0.1 °C/min. The resulting colorless crystals were washed with a mixture of DMF, ethanol and water (v/v = 5:2:1) to give **1** (0.002 g). Yield: 48.8%. Elemental analysis calcd (%) for **1**: C 63.11, H 4.74, N 3.87; found: C 60.46, H 4.50, N 3.96%.

**Synthesis of Zn<sub>8</sub>(OH)<sub>4</sub>(TCBPB)<sub>4</sub>·2DMF·EtOH·3H<sub>2</sub>O (2).** Complex **2** was prepared as complex **1**, with triethylamine (0.025mL, 5% in ethanol) in place of pyridine, and a reaction temperature of 100 °C for 48 hours. The resulting block colorless crystals were washed to give **2** (0.0015 g). Yield: 45.5%. Elemental analysis calcd (%) for **2**: C 64.66, H 3.98, N 0.80; found: C 62.26, H 3.71, N 1.12%.

**X-Ray diffraction studies.** Single crystal X-ray diffraction was performed on a

Bruker SMART CCD diffractometer equipped with Mo K $\alpha$  radiation for **1** and Cu K $\alpha$  radiation for **2**. Raw data collection and cell refinement were done using SMART; data reduction was performed using SAINT+ and corrected for Lorentz and polarization effects.<sup>4</sup> Structures were solved by direct methods with SHELXTL and refined by full-matrix least-squares on  $F^2$  using SHELX-97.<sup>5</sup> Non-hydrogen atoms were refined with anisotropic displacement parameters during the final cycles. Hydrogen atoms were placed in calculated positions with isotropic displacement parameters set to  $1.2 \times U_{eq}$  of the attached atom. The solvent molecules in **1** and **2** are highly disordered, and attempts to locate and refine the solvent peaks were unsuccessful. Contributions of scattering due to these solvent molecules were removed using the SQUEEZE routine of PLATON; structures of **1** and **2** were then refined again using the data generated.<sup>6</sup>

## References.

1. Plater, M. J.; McKay, M.; Jackson, T. *Perkin I* **2000**, *16*, 2695.
2. Kotha, S.; Kashinath, D.; Lahiri, K.; Sunoj, R. B. *Eur. J. Org. Chem.* **2004**, 4003.
3. Chen, S. L.; Xu, C. G.; Zhao, K. Q.; Hu, P. *Sichuan Shifan Daxue Xuebao* **2000**, *23*(5), 511.
4. SAINT+, Bruker Analytical X-Ray Systems, Inc., Madison, WI, **2001**.
5. Sheldrick, G. M. *SHELX-97*, Bruker Analytical X-Ray Systems, Inc., Madison, WI, **1997**.
6. Spek, A. L. *J. Appl. Crystallogr.* **2003**, *36*, 7-13.

## Supporting Figures:

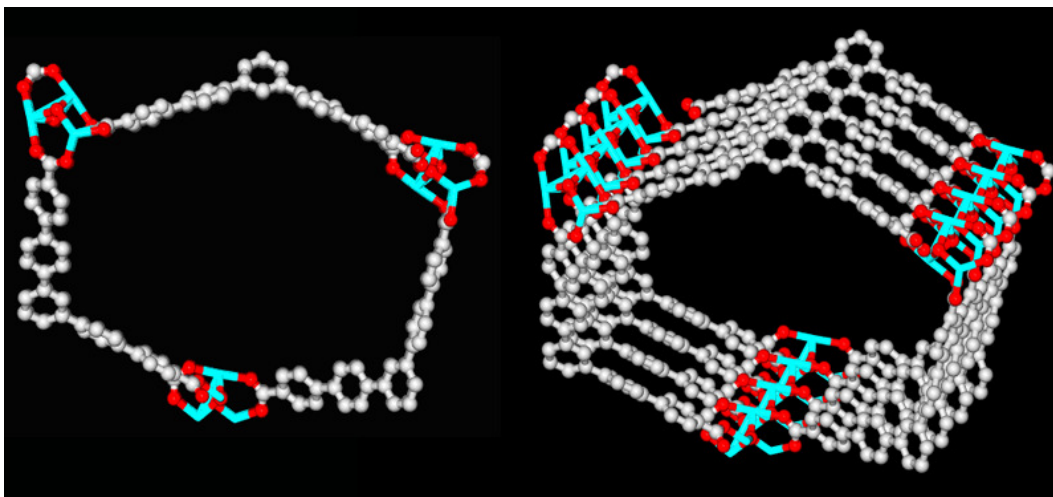

**Figure S1.** View of the left-handed helical chain in **1** formed by TCBPB ligands connecting different zinc atoms in the [010] direction (left) and approximate [010] direction (right).

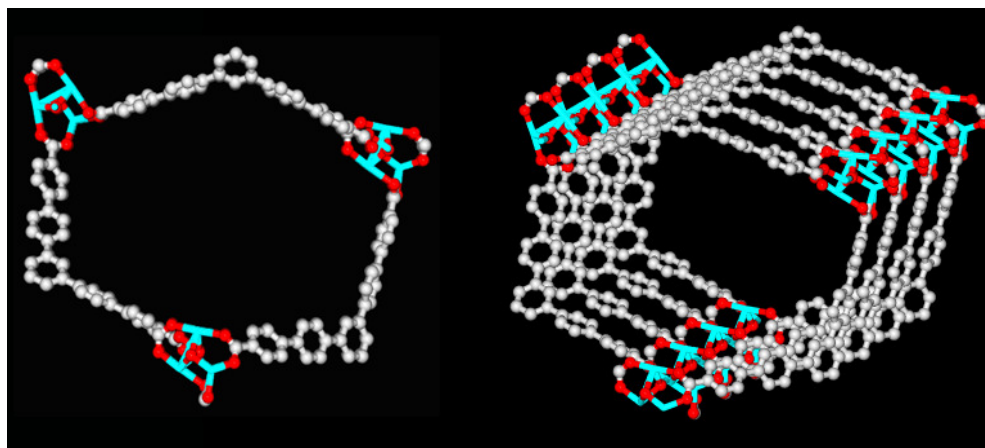

**Figure S2.** View of the right-handed helical chain in **1** formed by the TCBPB ligand connecting different zinc atoms in the [010] direction (left) and approximate [010] direction (right).

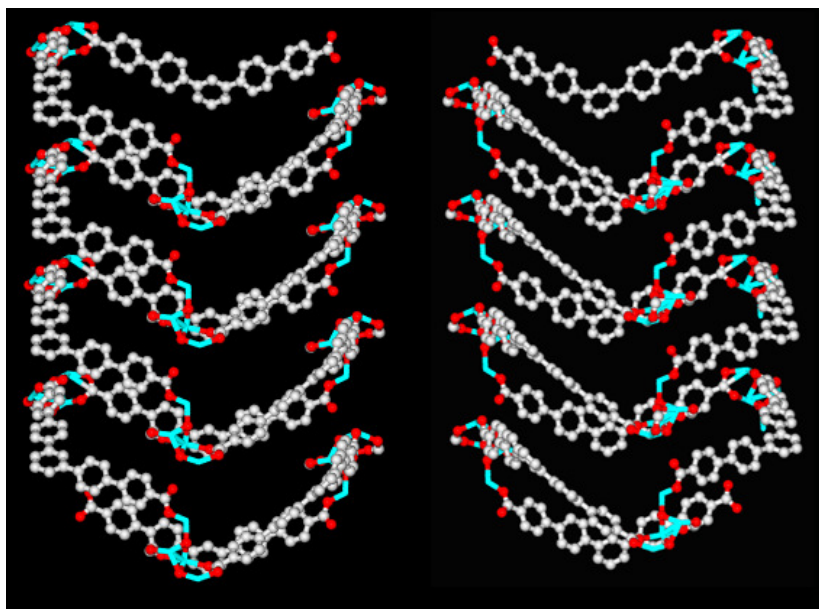

**Figure S3.** View of the left- and right-handed helical chains in **1** formed by TCBPB connecting different zinc atoms.

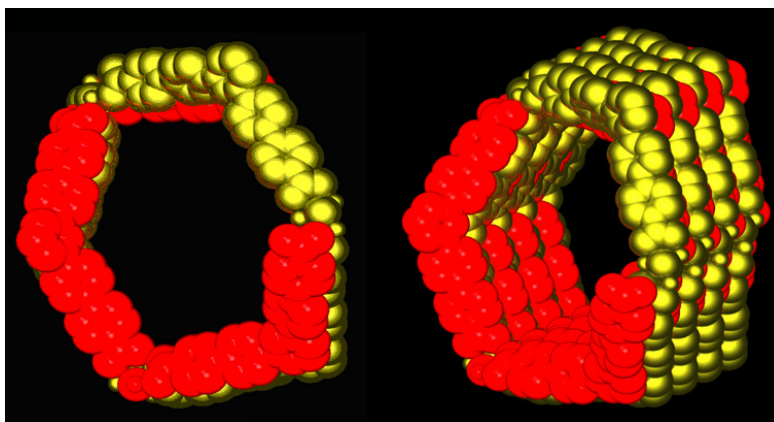

**Figure S4.** View of double helical chains in **1** formed by TCBPB connecting different Zn atoms in the [010] direction (left) and approximate [010] direction (right).

Every TCBPB1 ligand connects Zn1, Zn2 and Zn3 while every TCBPB2 ligand connects Zn1, Zn2, Zn3 and Zn4 to form left or right-handed helical chains. Every two same-handed helical chains formed by TCBPB1 and TCBPB2, respectively, create a double helical chain by sharing Zn1, Zn2, Zn3 and the  $\mu_3$ -OH groups.

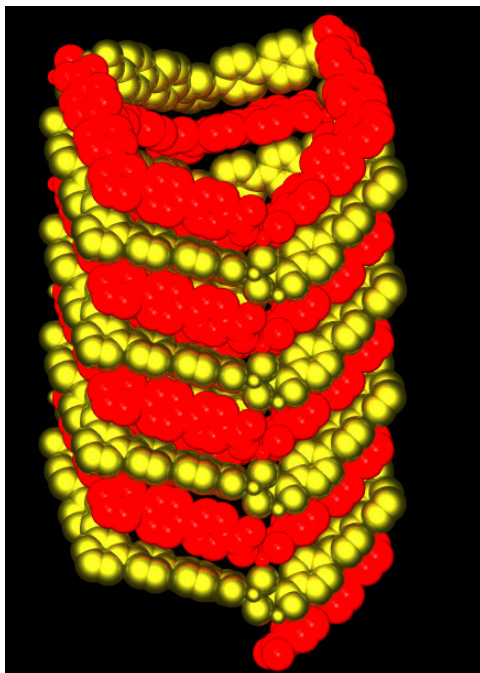

**Figure S5.** View of the double helical chains in **1** formed by TCBPB connecting different zinc atoms in the approximate [001] direction.

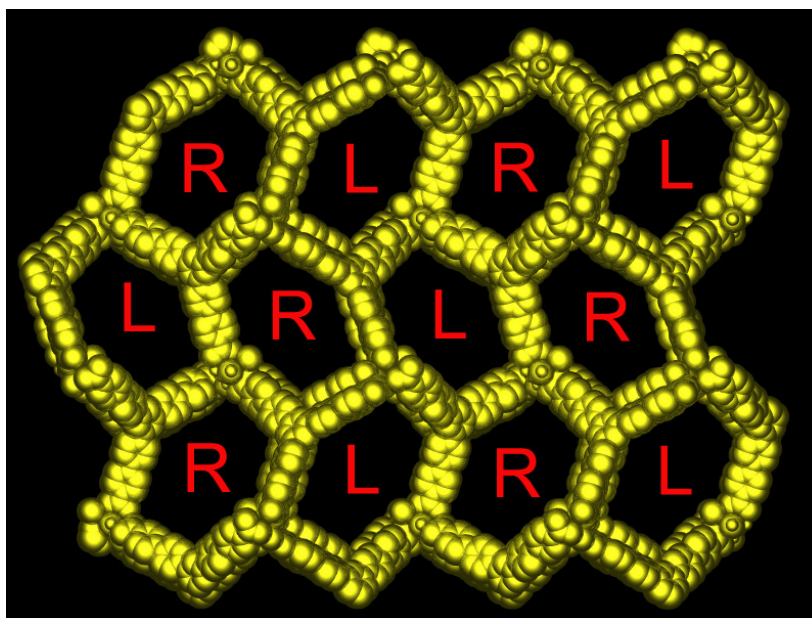

**Figure S6.** 3D porous framework with helical channels in **1** along [010] direction. Every ligand acts as the rim of three helical chains.

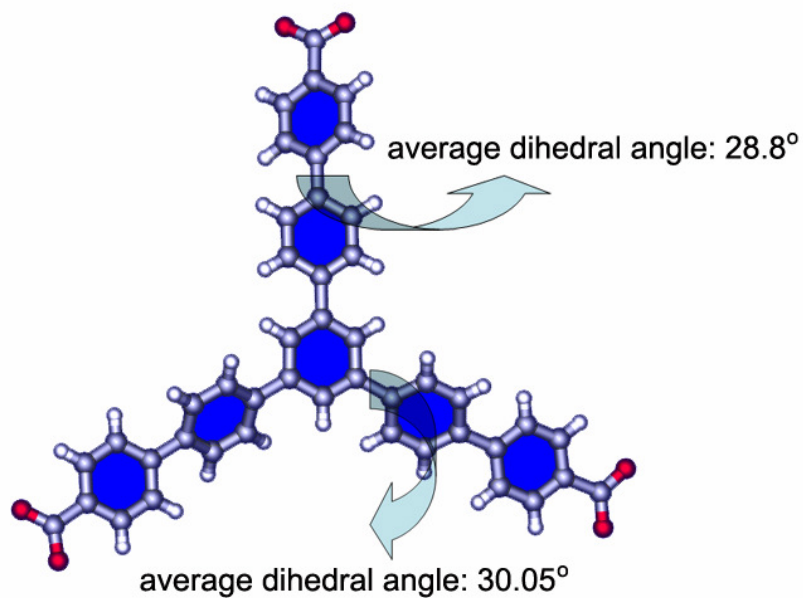

**Figure S7.** The non-planar TCBPB ligand in **1**. Due to C-H bond repulsions, there are large dihedral angles between the two peripheral rings, and between the central and peripheral rings.

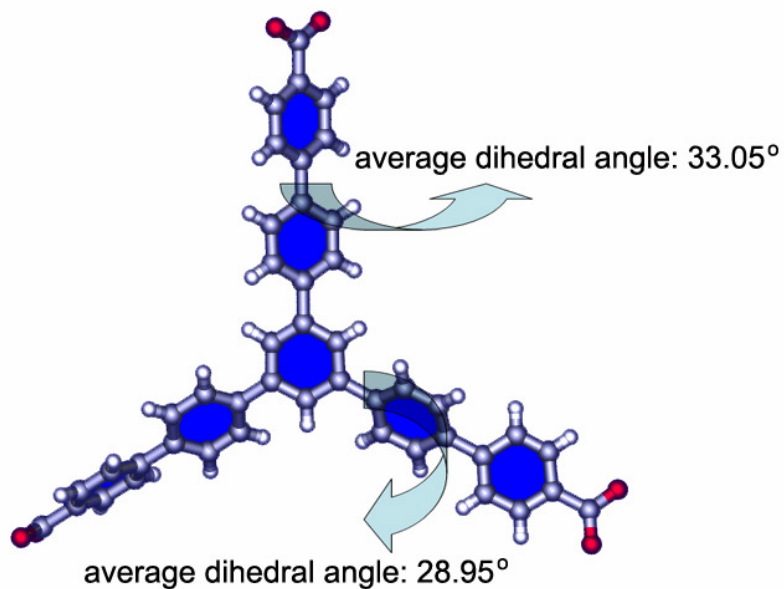

**Figure S8.** View of non-planar TCBPB in **2**.



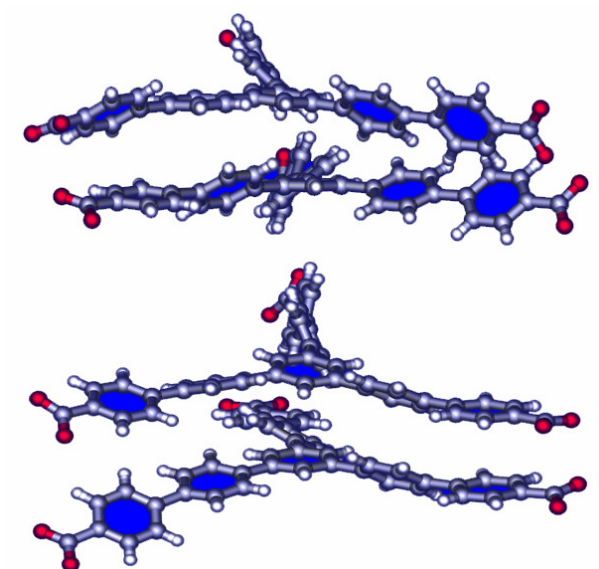

**Figure S9.** View of TCBPB pair in **1** (top) and **2** (bottom). Due to the ligand's non-planarity, there are no strong  $\pi$ -- $\pi$  interactions.

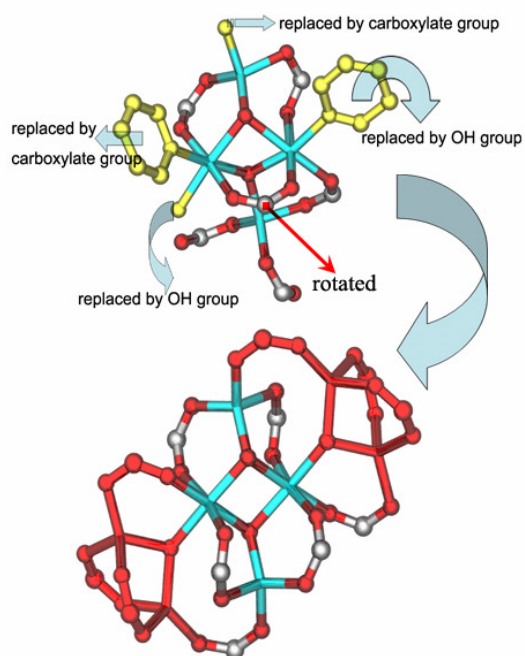

**Figure S10.** Relationship between the tetrahedral SBU in **1** (top) and the butterfly SBU in **2** (bottom). The tetra-nuclear SBU in **1** is transformed to the “butterfly” SBU in **2** when the coordinated pyridine or water molecules are replaced by  $\mu_3$ -OH and carboxylate groups.



## Nitrogen Adsorption Measurement for **2**

A BERKMAN COULTER SA3100 surface area analyzer was used to measure N<sub>2</sub> isotherms. As-synthesized **2** was exchanged with MeOH to remove DMF solvates from the pores, then dried at 100 °C under vacuum for 12 hours to produce a solvent-free sample. A sample of solvent-free **2** (31 mg) was used for the BET measurement. Internal lines of the instrument were flushed by utilizing the “flushing lines” function of the program before measurement. (Adsorption data of N<sub>2</sub> is listed in Table S1.) The BET surface area of **2** was found is 758 m<sup>2</sup>/g (calcd from the data of 0.05 < P/P<sub>0</sub> < 0.2).

**Table S1.** Volumetric N<sub>2</sub> adsorption data of **2** at 77K.

| Pressure<br>(P/P <sub>0</sub> ) | Adsorption<br>(cm <sup>3</sup> /g, STP) | Pressure<br>(P/P <sub>0</sub> ) | Adsorption<br>(cm <sup>3</sup> /g, STP) | Pressure<br>(P/P <sub>0</sub> ) | Adsorption<br>(cm <sup>3</sup> /g, STP) |
|---------------------------------|-----------------------------------------|---------------------------------|-----------------------------------------|---------------------------------|-----------------------------------------|
| 0                               | 0                                       | 0.5203                          | 232.837                                 | 0.9555                          | 247.420                                 |
| 0                               | 0                                       | 0.5601                          | 233.777                                 | 0.9439                          | 246.788                                 |
| 0                               | 0                                       | 0.6000                          | 234.726                                 | 0.9321                          | 246.228                                 |
| 1E-4                            | 49.568                                  | 0.6404                          | 235.701                                 | 0.9149                          | 245.388                                 |
| 2E-4                            | 68.908                                  | 0.6600                          | 236.244                                 | 0.8976                          | 244.538                                 |
| 2E-4                            | 90.159                                  | 0.6803                          | 236.740                                 | 0.8802                          | 243.743                                 |
| 4E-4                            | 113.666                                 | 0.7002                          | 237.283                                 | 0.8629                          | 242.955                                 |
| 6E-4                            | 134.443                                 | 0.7204                          | 237.824                                 | 0.8455                          | 242.221                                 |
| 0.0011                          | 155.900                                 | 0.7405                          | 238.361                                 | 0.8341                          | 241.751                                 |
| 0.0027                          | 178.213                                 | 0.7601                          | 238.944                                 | 0.8192                          | 241.166                                 |
| 0.0106                          | 196.984                                 | 0.7803                          | 239.532                                 | 0.8063                          | 240.734                                 |
| 0.0274                          | 206.810                                 | 0.8001                          | 240.120                                 | 0.7945                          | 240.317                                 |
| 0.0368                          | 209.587                                 | 0.8130                          | 240.490                                 | 0.7791                          | 239.859                                 |
| 0.0465                          | 211.741                                 | 0.8245                          | 240.883                                 | 0.7661                          | 239.475                                 |
| 0.0595                          | 213.894                                 | 0.8356                          | 241.250                                 | 0.7543                          | 239.162                                 |
| 0.0669                          | 214.947                                 | 0.8500                          | 241.780                                 | 0.7391                          | 238.766                                 |
| 0.081                           | 216.552                                 | 0.8629                          | 242.200                                 | 0.7192                          | 238.259                                 |
| 0.1013                          | 218.403                                 | 0.8744                          | 242.685                                 | 0.6991                          | 237.733                                 |
| 0.1193                          | 219.732                                 | 0.8851                          | 243.113                                 | 0.6794                          | 237.275                                 |
| 0.1393                          | 221.005                                 | 0.9003                          | 243.755                                 | 0.6591                          | 236.798                                 |
| 0.1597                          | 222.096                                 | 0.9125                          | 244.367                                 | 0.6391                          | 236.360                                 |
| 0.1799                          | 223.072                                 | 0.9237                          | 244.985                                 | 0.6194                          | 235.887                                 |
| 0.2001                          | 223.940                                 | 0.9343                          | 245.573                                 | 0.5994                          | 235.452                                 |

|        |         |        |         |        |         |
|--------|---------|--------|---------|--------|---------|
| 0.2400 | 225.397 | 0.9450 | 246.196 | 0.5790 | 234.998 |
| 0.2798 | 226.692 | 0.9551 | 246.803 | 0.5593 | 234.622 |
| 0.3196 | 227.845 | 0.9697 | 247.694 | 0.5394 | 234.200 |
| 0.3603 | 228.936 | 0.9801 | 248.364 | 0.5195 | 233.790 |
| 0.4001 | 229.978 | 0.9889 | 248.957 | 0.4991 | 233.403 |
| 0.4406 | 230.964 | 0.9969 | 249.621 | 0.4796 | 232.930 |
| 0.4805 | 231.892 | 0.9675 | 248.078 | 0.4509 | 232.279 |
|        |         |        |         | 0.3985 | 231.269 |
